# Supplementary material for: A synergetic model for implementing single-component white-light emission: a case study of zero-dimensional cadmium halides
Source: Royal Society of Chemistry journal article supplement (doi:10.1039/d2qm01049f), 2022-12-29
Supplement: d2qm01049f1.pdf [file d2qm01049f1.pdf]

## Supporting Information

### **Synergetic Model for Implementing Single-Component White-Light Emission: A Case Study of Zero-Dimensional Cadmium Halides**

Jiantao Yuan,<sup>a</sup> Guojun Zhou,<sup>a</sup> Jian Zhang,<sup>a</sup> Xian-Ming Zhang\*<sup>a,b</sup>

<sup>a</sup> *Key Laboratory of Magnetic Molecules and Magnetic Information Materials (Ministry of Education), School of Chemistry and Material Science, Shanxi Normal University, Taiyuan 030006, China. Email: [zhangxm@dns.sxnu.edu.cn](mailto:zhangxm@dns.sxnu.edu.cn)*

<sup>b</sup> *College of Chemistry & Chemical Engineering, Key Laboratory of Interface Science and Engineering in Advanced Material, Ministry of Education, Taiyuan University of Technology, Taiyuan, Shanxi 030024, P. R. China*

## Contents

**Figure S1.** Photographs of  $(C_6H_7NCl)_2CdCl_4$ ,  $(C_6H_7NBr)_2CdBr_4$  and  $(C_6H_7NI)_2CdI_4$  crystals upon natural light.

**Figure S2.** FT-IR spectrum of  $(C_6H_7NCl)_2CdCl_4$ ,  $(C_6H_7NBr)_2CdBr_4$  and  $(C_6H_7NI)_2CdI_4$ .

**Figure S3.** TGA of  $(C_6H_7NCl)_2CdCl_4$ ,  $(C_6H_7NBr)_2CdBr_4$  and  $(C_6H_7NI)_2CdI_4$ .

**Figure S4.** Experimental and simulated PXRD data of  $(C_6H_7NCl)_2CdCl_4$ ,  $(C_6H_7NBr)_2CdBr_4$  and  $(C_6H_7NI)_2CdI_4$ .

**Figure S5.** UV absorption spectra of  $(C_6H_7NCl)_2CdCl_4$ ,  $(C_6H_7NBr)_2CdBr_4$  and  $(C_6H_7NI)_2CdI_4$ .

**Figure S6.** CIE of  $(C_6H_7NCl)_2CdCl_4$  and  $(C_6H_7NBr)_2CdBr_4$ .

**Figure S7.** Emission spectra of  $(C_6H_7NCl)_2CdCl_4$  and  $(C_6H_7NBr)_2CdBr_4$  under different excitations.

**Figure S8.** Emission spectra before and after three months of  $(C_6H_7NCl)_2CdCl_4$  and  $(C_6H_7NBr)_2CdBr_4$ .

**Figure S9.** Emission spectra of  $(C_6H_7NCl)_2CdCl_4$  and  $(C_6H_7NBr)_2CdBr_4$  for mm-sized bulk crystals and powder sample.

**Figure S10.** Excitation and emission spectra of  $C_6H_6NCl \cdot HCl$  and  $C_6H_6NBr \cdot HBr$ ; Emission spectra under different excitations of  $C_6H_6NCl \cdot HCl$  and  $C_6H_6NBr \cdot HBr$ .

**Figure S11.** PL decay lifetime of  $(C_6H_7NCl)_2CdCl_4$  at 558 nm and  $(C_6H_7NBr)_2CdBr_4$  at 570 nm.

**Figure S12.** The temperature-dependent PL emission spectra of  $(C_6H_7NCl)_2CdCl_4$  and  $(C_6H_7NBr)_2CdBr_4$ .

**Figure S13.** The temperature-dependent PL emission spectra of  $C_6H_6NCl \cdot HCl$  and  $C_6H_6NBr \cdot HBr$ .

**Figure S14.** The temperature-dependent FWHM curve of  $(C_6H_7NCl)_2CdCl_4$  and  $(C_6H_7NBr)_2CdBr_4$ .

**Table S1.** Crystal data of  $(C_6H_7NCl)_2CdCl_4$ ,  $(C_6H_7NBr)_2CdBr_4$  and  $(C_6H_7NI)_2CdI_4$ .

**Table S2.** Selective bond lengths of  $(C_6H_7NCl)_2CdCl_4$ ,  $(C_6H_7NBr)_2CdBr_4$  and  $(C_6H_7NI)_2CdI_4$ .

**Table S3.** Selective bond angles of  $(C_6H_7NCl)_2CdCl_4$ ,  $(C_6H_7NBr)_2CdBr_4$  and  $(C_6H_7NI)_2CdI_4$ .

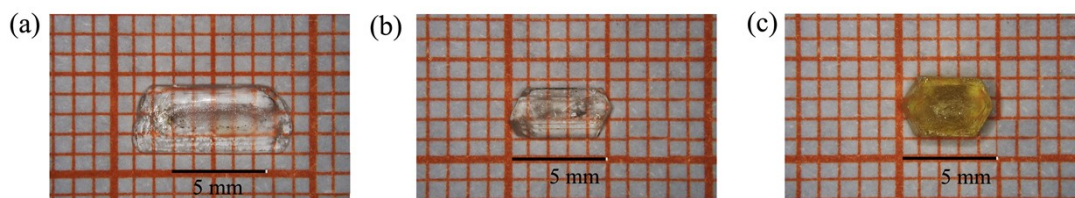

**Figure S1.** Photographs of  $(C_6H_7NCl)_2CdCl_4$  (a),  $(C_6H_7NBr)_2CdBr_4$  (b) and  $(C_6H_7NI)_2CdI_4$  (c) crystals upon natural light.

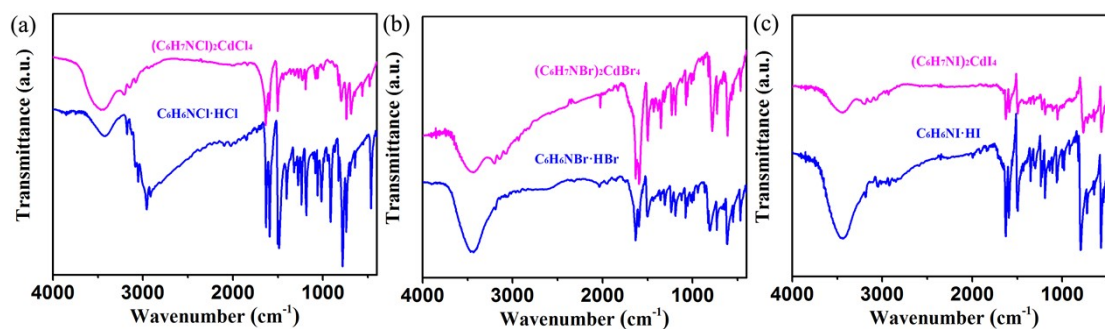

**Figure S2.** FT-IR spectrum of  $(C_6H_7NCl)_2CdCl_4$  (a),  $(C_6H_7NBr)_2CdBr_4$  (b) and  $(C_6H_7NI)_2CdI_4$  (c).

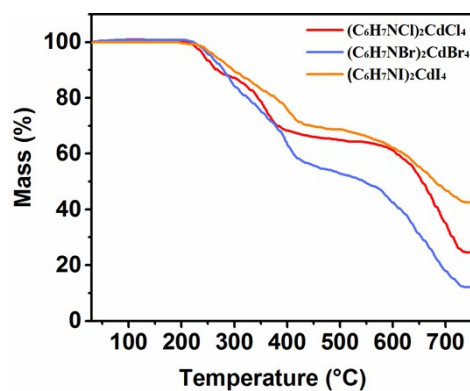

**Figure S3.** TGA of  $(C_6H_7NCl)_2CdCl_4$ ,  $(C_6H_7NBr)_2CdBr_4$  and  $(C_6H_7NI)_2CdI_4$  (c).

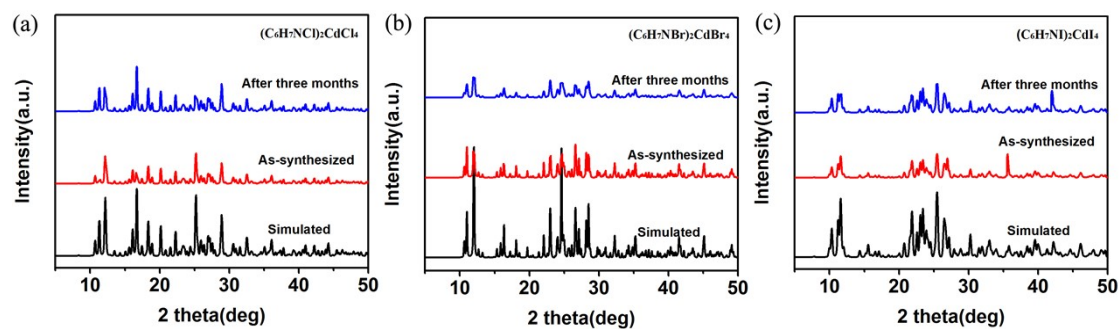

**Figure S4.** Experimental and simulated PXRD data of  $(C_6H_7NCl)_2CdCl_4$  (a),  $(C_6H_7NBr)_2CdBr_4$  (b) and  $(C_6H_7NI)_2CdI_4$  (c).

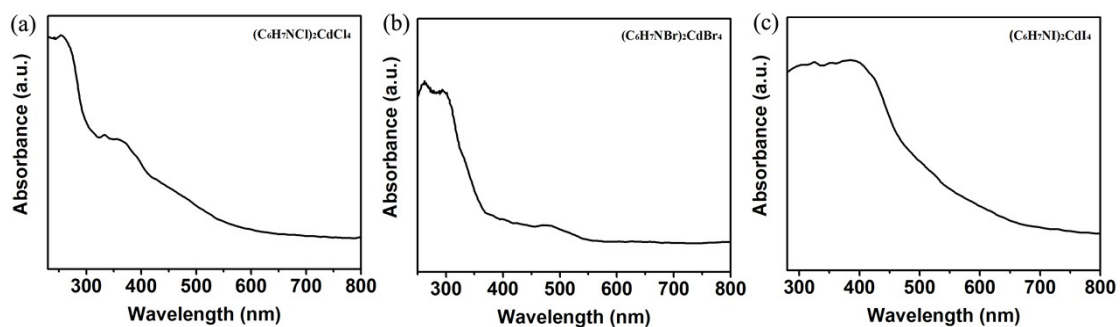

**Figure S5.** UV absorption spectra of  $(C_6H_7NCl)_2CdCl_4$  (a),  $(C_6H_7NBr)_2CdBr_4$  (b) and  $(C_6H_7NI)_2CdI_4$  (c).

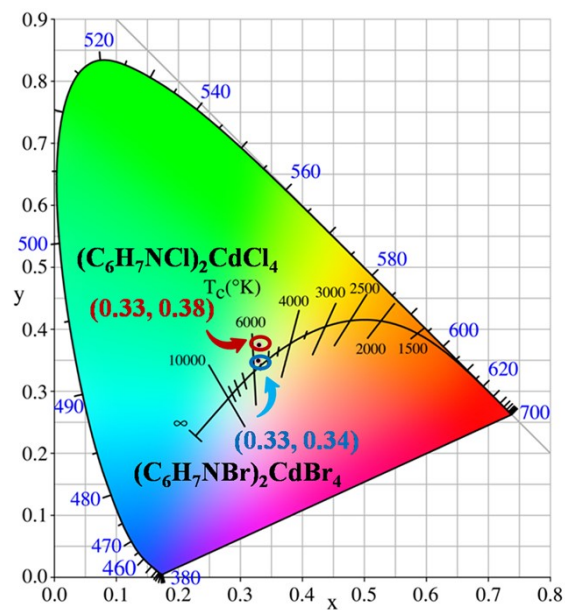

**Figure S6.** CIE of  $(\text{C}_6\text{H}_7\text{NCl})_2\text{CdCl}_4$  (red point) and  $(\text{C}_6\text{H}_7\text{NBr})_2\text{CdBr}_4$  (blue point).

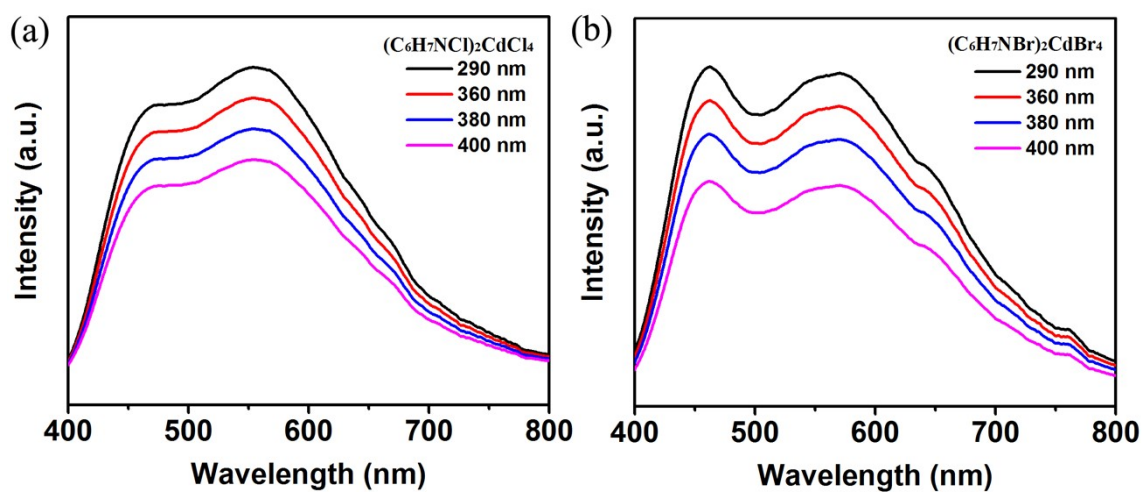

**Figure S7.** Emission spectra of  $(\text{C}_6\text{H}_7\text{NCl})_2\text{CdCl}_4$  and  $(\text{C}_6\text{H}_7\text{NBr})_2\text{CdBr}_4$  under different excitations.

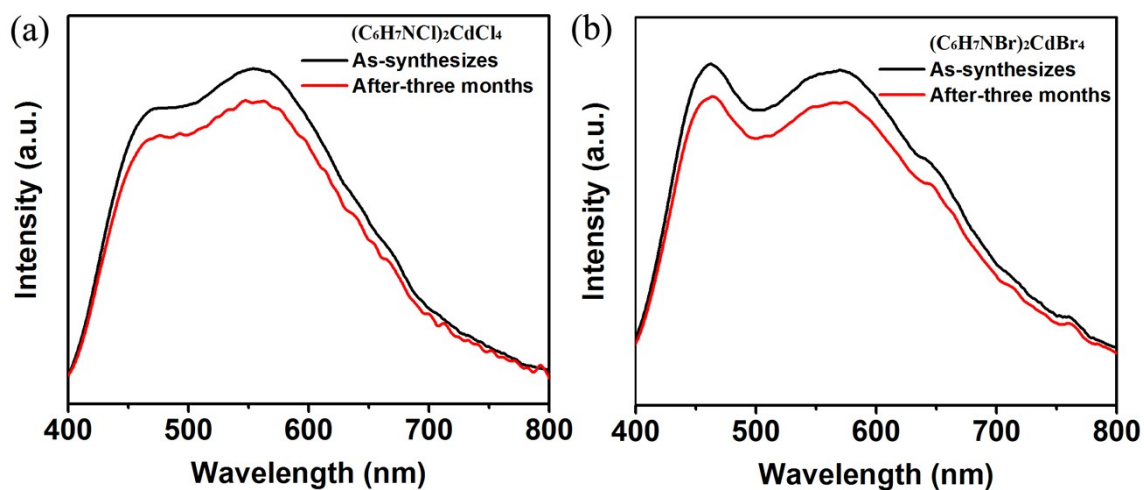

**Figure S8.** Emission spectra before and after three months of  $(\text{C}_6\text{H}_7\text{NCl})_2\text{CdCl}_4$  (a) and  $(\text{C}_6\text{H}_7\text{NBr})_2\text{CdBr}_4$  (b).

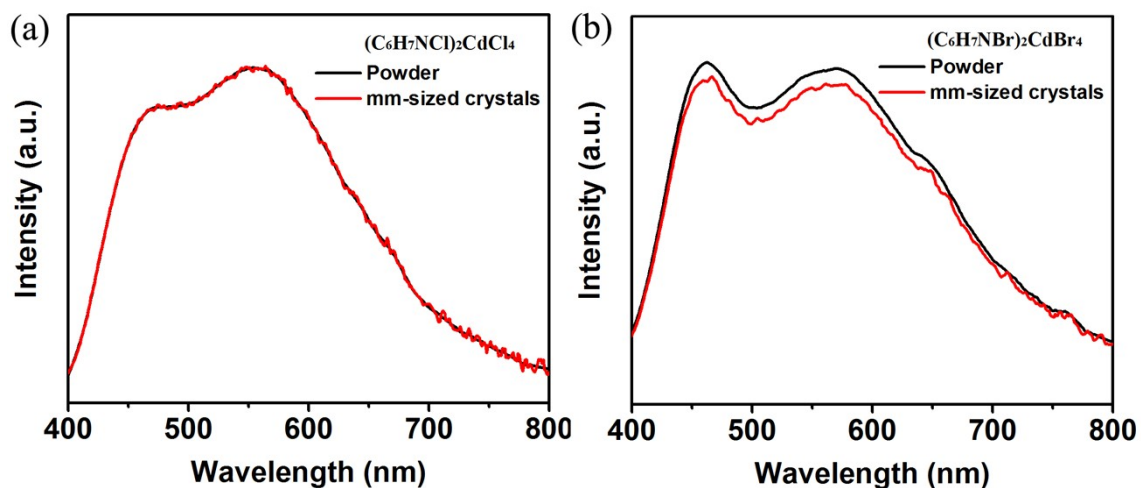

**Figure S9.** Emission spectra of  $(\text{C}_6\text{H}_7\text{NCl})_2\text{CdCl}_4$  (a) and  $(\text{C}_6\text{H}_7\text{NBr})_2\text{CdBr}_4$  (b) for mm-sized bulk crystals and powder sample.

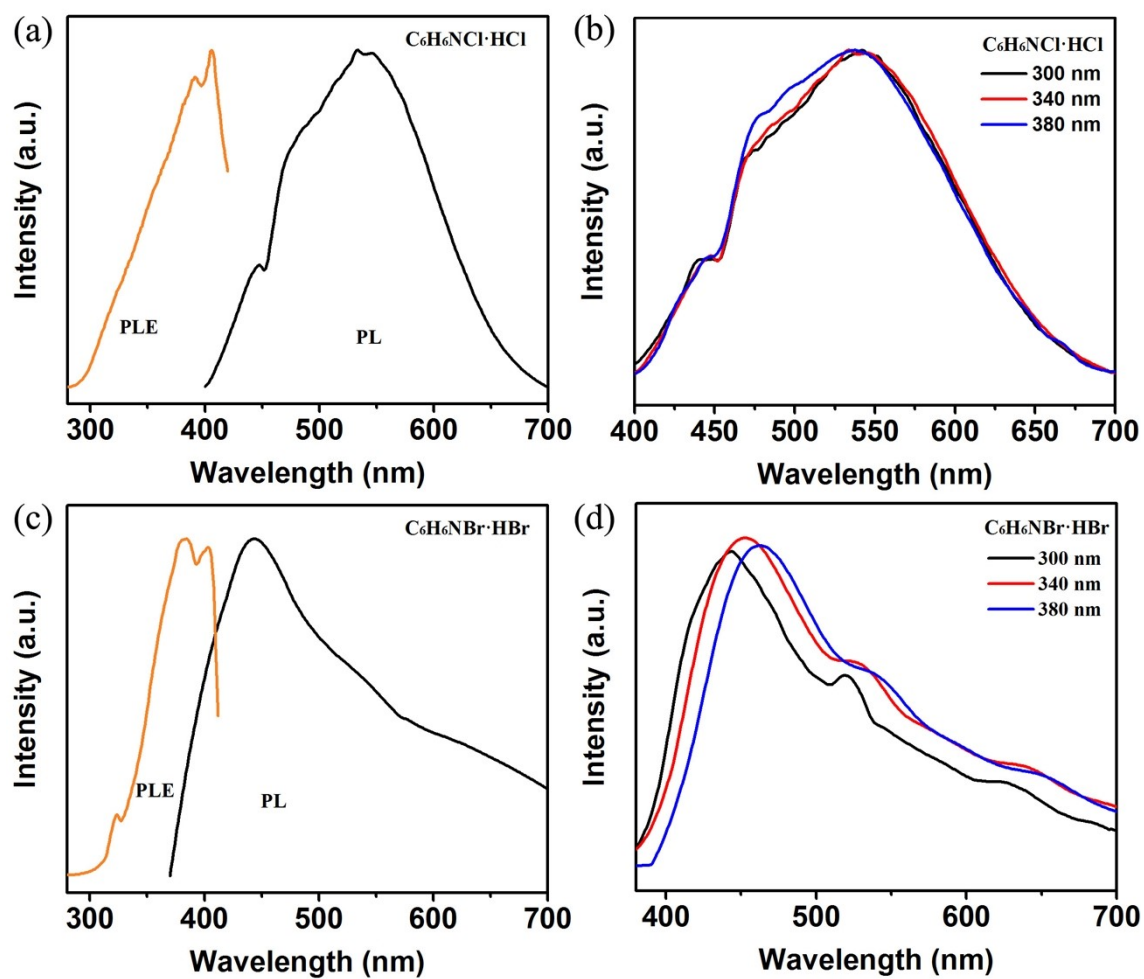

**Figure S10.** (a) Excitation and emission spectra of  $C_6H_6NCl \cdot HCl$ , (c)  $C_6H_6NBr \cdot HBr$ ; (b) Emission spectra under different excitations of  $C_6H_6NCl \cdot HCl$ , (d)  $C_6H_6NBr \cdot HBr$ .

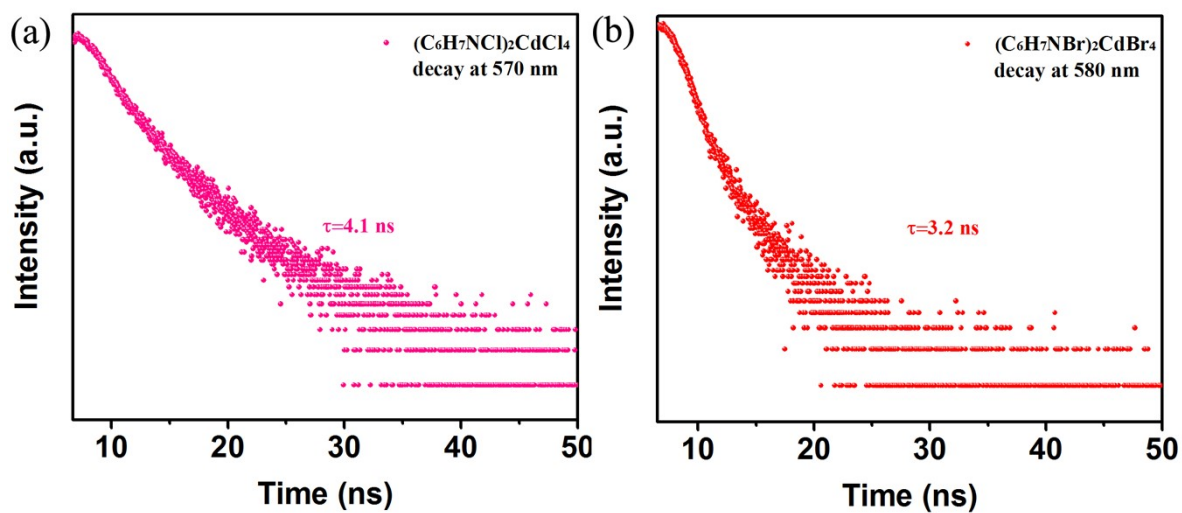

**Figure S11.** PL decay lifetime of  $(\text{C}_6\text{H}_7\text{NCl})_2\text{CdCl}_4$  at 570 nm (a) and  $(\text{C}_6\text{H}_7\text{NBr})_2\text{CdBr}_4$  at 580 nm (b).



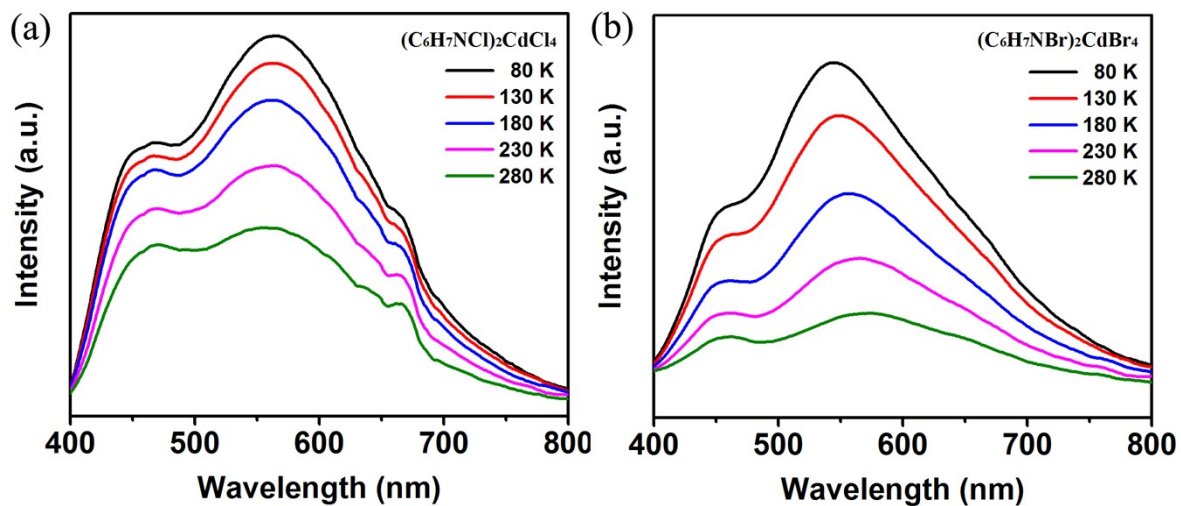

**Figure S12.** The temperature-dependent PL emission spectra of  $(\text{C}_6\text{H}_7\text{NCl})_2\text{CdCl}_4$  (a) and  $(\text{C}_6\text{H}_7\text{NBr})_2\text{CdBr}_4$  (b).

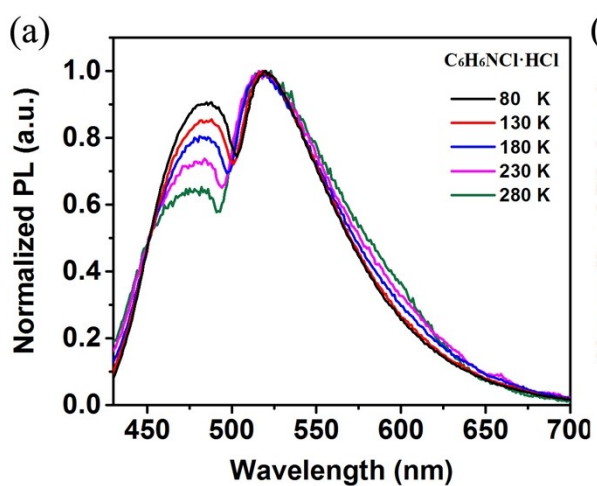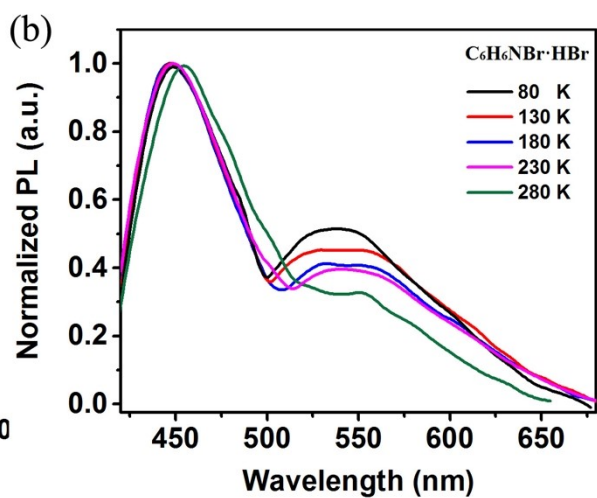

**Figure**

**S13.**

The temperature-dependent PL

emission spectra of  $C_6H_6NCl \cdot HCl$  (a) and  $C_6H_6NBr \cdot HBr$  (b).

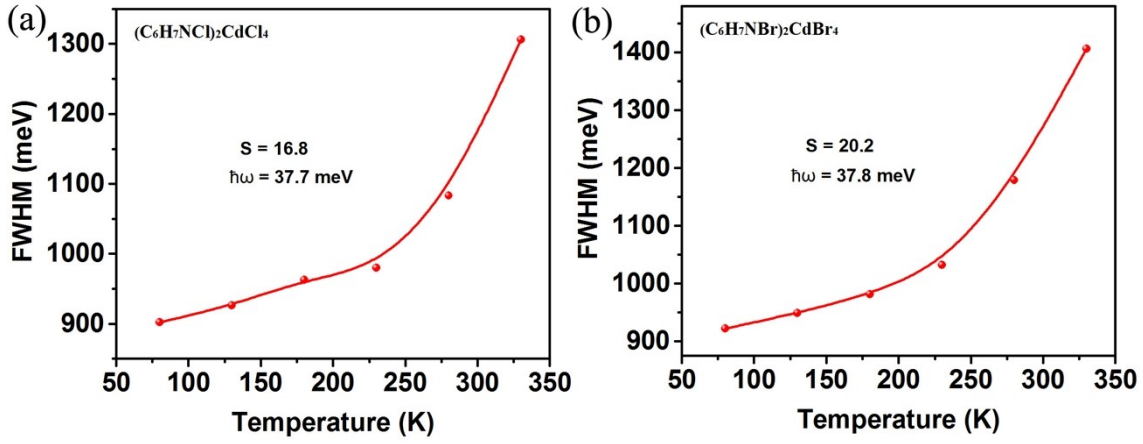

**Figure S14.** The temperature-dependent FWHM curve of  $(C_6H_7NCl)_2CdCl_4$  (a) and  $(C_6H_7NBr)_2CdBr_4$  (b).

Huang-Rhys factor ( $S$ ) is often used to evaluate the electron-phonon coupling, and the value of  $S$  can reflect the temperature-dependence of the electron-phonon coupling. The value of  $S$  is a key parameter for STEs formation, and it can be obtained via the following formula:

$$FWHM = 2.36\sqrt{S} \hbar\omega \sqrt{\coth\frac{\hbar\omega}{2k_B T}}$$

The  $S$  factor is calculated to be 16.8, 20.2, and  $\hbar\omega$  is 37.7 meV, 37.8 meV for  $(C_6H_7NCl)_2CdCl_4$  and  $(C_6H_7NBr)_2CdBr_4$ , respectively, indicating the strong electron-phonon coupling effect and highly distorted lattice structure in  $(C_6H_7NX)_2CdX_4$  to favor the formation of STEs.

**Table S1.** Crystal data of  $(C_6H_7NCl)_2CdCl_4$ ,  $(C_6H_7NBr)_2CdBr_4$  and  $(C_6H_7NI)_2CdI_4$ 

| Formula                                                             | $(C_6H_7NCl)_2CdCl_4$ | $(C_6H_7NBr)_2CdBr_4$ | $(C_6H_7NI)_2CdI_4$ |
|---------------------------------------------------------------------|-----------------------|-----------------------|---------------------|
| Mr                                                                  | 511.35                | 778.11                | 1060.05             |
| Crystal system                                                      | monoclinic            | monoclinic            | monoclinic          |
| Space group                                                         | $P2_1/c$              | $P2_1/c$              | $P2_1/c$            |
| $Z$                                                                 | 4                     | 4                     | 4                   |
| $a/\text{\AA}$                                                      | 8.3379(10)            | 8.55700(10)           | 8.9322(3)           |
| $b/\text{\AA}$                                                      | 15.6323(10)           | 16.26640(10)          | 17.1175(9)          |
| $c/\text{\AA}$                                                      | 14.5932(10)           | 14.9119(2)            | 15.3568(6)          |
| $\alpha/^\circ$                                                     | 90                    | 90                    | 90                  |
| $\beta/^\circ$                                                      | 98.3260(10)           | 98.1280(10)           | 97.486(4)           |
| $\gamma/^\circ$                                                     | 90                    | 90                    | 90                  |
| $V/\text{\AA}^3$                                                    | 1882.43(3)            | 2054.76(4)            | 2327.99(17)         |
| $\rho_{\text{calc}}/\text{g cm}^{-3}$                               | 1.804                 | 2.515                 | 3.025               |
| $\mu/\text{mm}^{-1}$                                                | 17.079                | 22.141                | 8.891               |
| F(000)                                                              | 1000.0                | 1432.0                | 1864.0              |
| $R_{\text{int}}/R_{\text{sigma}}$                                   | 0.0868/0.0302         | 0.0648/0.0201         | 0.0353/0.0630       |
| Reflections                                                         | 38897                 | 47060                 | 10866               |
| Data/Para.                                                          | 3885/198              | 4262/198              | 5282/208            |
| $R_1^a, wR_2^b[I > 2\sigma(I)]$                                     | 0.0483/0.1268         | 0.0363/0.0943         | 0.0630/0.1595       |
| $R_1^a, wR_2^b[\text{all data}]$                                    | 0.0485/0.1270         | 0.0372/0.0949         | 0.0912/0.1819       |
| $\Delta\rho_{\text{max}}/\Delta\rho_{\text{min}}/e \text{\AA}^{-3}$ | 1.05/-1.62            | 1.65/-1.02            | 1.92/-1.36          |

$$^aR_1 = \sum||F_o| - |F_c||/\sum|F_o|. \quad ^b wR_2 = \{\sum[w(F_o^2 - F_c^2)^2]/\sum[w(F_o^2)^2]\}^{1/2}$$

**Table S2.** Selective bond lengths of  $(C_6H_7NCl)_2CdCl_4$ ,  $(C_6H_7NBr)_2CdBr_4$  and  $(C_6H_7NI)_2CdI_4$ 

| $(C_6H_7NCl)_2CdCl_4$ |             | $(C_6H_7NBr)_2CdBr_4$ |            | $(C_6H_7NI)_2CdI_4$ |            |
|-----------------------|-------------|-----------------------|------------|---------------------|------------|
| Atom–Atom             | Length / Å  | Atom–Atom             | Length / Å | Atom–Atom           | Length / Å |
| Cd1–Cl1               | 2.4641(10)  | Cd1–Br1               | 2.5763(6)  | Cd1–I1              | 2.7862(11) |
| Cd1–Cl2               | 2.4906(10)  | Cd1–Br2               | 2.5550(6)  | Cd1–I2              | 2.7591(12) |
| Cd1–Cl3               | 2.4424(9)   | Cd1–Br3               | 2.5930(6)  | Cd1–I3              | 2.7338(11) |
| Cd1–Cl4               | 2.4272 (10) | Cd1–Br4               | 2.6219(6)  | Cd1–I4              | 2.768(11)  |
| Cl5–C12               | 1.770(4)    | Br5–C6                | 1.952(5)   | I6–C7               | 2.123(13)  |
| Cl6–C6                | 1.781(4)    | Br6–C12               | 1.933(5)   | I5–C1               | 2.186(12)  |

**Table S3.** Selective bond angles of  $(C_6H_7NCl)_2CdCl_4$ ,  $(C_6H_7NBr)_2CdBr_4$  and  $(C_6H_7NI)_2CdI_4$ 

| $(C_6H_7NCl)_2CdCl_4$ |           | $(C_6H_7NBr)_2CdBr_4$ |           | $(C_6H_7NI)_2CdI_4$ |            |
|-----------------------|-----------|-----------------------|-----------|---------------------|------------|
| Cl2–Cd1–Cl1           | 100.50(3) | Br1–Cd1–Br4           | 106.33(2) | I1–Cd1–I2           | 112.04(4)  |
| Cl4–Cd1–Cl1           | 112.68(4) | Br1–Cd1–Br3           | 112.03(2) | I3–Cd1–I4           | 112.66(16) |
| Cl4–Cd1–Cl2           | 111.54(4) | Br2–Cd1–Br4           | 110.30(2) | I2–Cd1–I4           | 113.10(2)  |
| Cl3–Cd1–Cl1           | 112.68(4) | Br2–Cd1–Br1           | 112.84(2) | I3–Cd1–I1           | 108.42(4)  |
| Cl3–Cd1–Cl2           | 105.01(3) | Br2–Cd1–Br3           | 113.28(2) | I2–Cd1–I1           | 107.89(4)  |
| Cl3–Cd1–Cl4           | 113.48(3) | Br3–Cd1–Br4           | 101.19(2) | I4–Cd1–I1           | 102.00(16) |
